# Supplementary material
Source: Springer Nature journal article supplement (https://www.springermedizin.de/resource/supplementary/13075_2009_2775_MOESM4_ESM.pdf/9692858)

**A****Vehicle**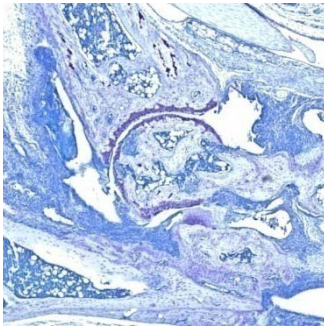**GW2580**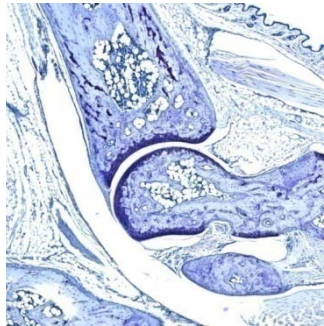**Imatinib**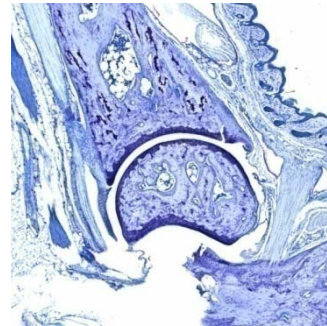**B****Synovitis****Pannus****Erosions****CIA Prev:**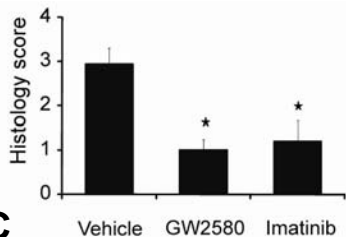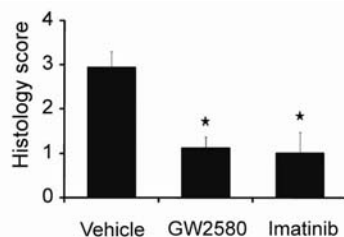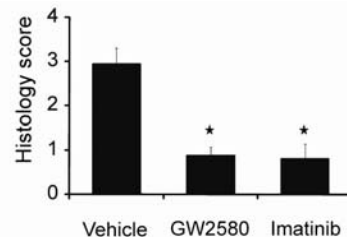**C****CIA Treat:**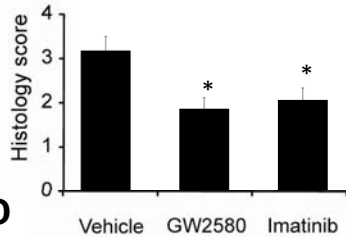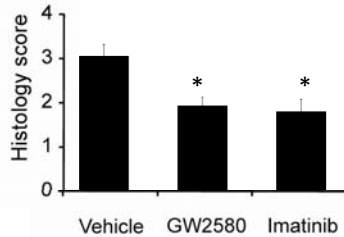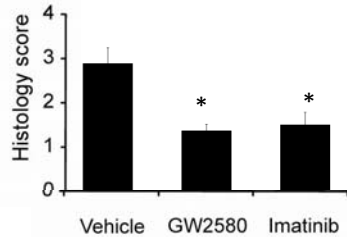**D****CAIA:**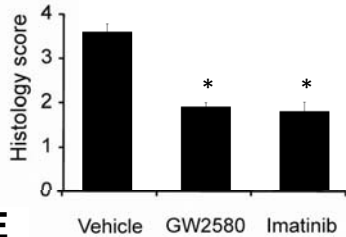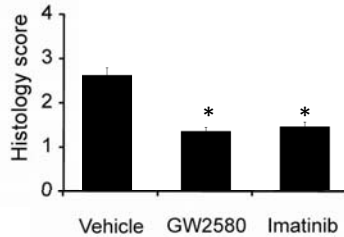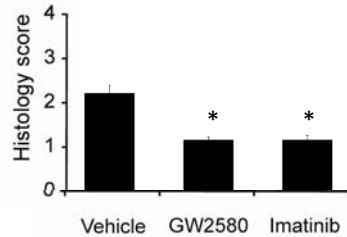**E****K/BxN:**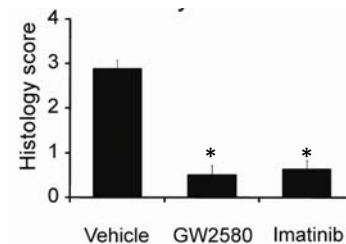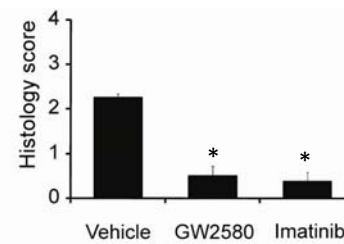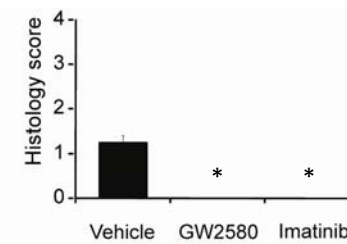

Supplement: MOESM4 [file 9692858]
